# Supplementary material
Source: publisher figshare collection journal article supplement (https://acs.figshare.com/ndownloader/files/10824569)
Supplement: Supplementary file 1 [file 10824569]

## Supporting Information

### Satellite-Based Estimates of Daily NO<sub>2</sub> Exposure in China Using Hybrid Random Forest and Spatiotemporal Kriging Model

Yu Zhan,<sup>†,‡,§</sup> Yuzhou Luo,<sup>||</sup> Xunfei Deng,<sup>⊥</sup> Kaishan Zhang,<sup>†</sup> Minghua Zhang,<sup>||</sup>  
Michael L. Grieneisen,<sup>||</sup> Baofeng Di<sup>\*,‡,†</sup>

<sup>†</sup>Department of Environmental Science and Engineering, Sichuan University, Chengdu, Sichuan 610065, China

<sup>‡</sup>Institute for Disaster Management and Reconstruction, Sichuan University, Chengdu, Sichuan 610200, China

<sup>§</sup>Sino-German Centre for Water and Health Research, Sichuan University, Chengdu, Sichuan 610065, China

<sup>||</sup>Department of Land, Air, and Water Resources, University of California, Davis, CA 95616, USA

<sup>⊥</sup>Institute of Digital Agriculture, Zhejiang Academy of Agricultural Sciences, Hangzhou, Zhejiang 310021, China

Corresponding author

\*Phone: +86 2885996656; fax +86 2885405613; e-mail: dibaofeng@scu.edu.cn.

Number of pages: 34

Number of tables: 11

Number of figures: 19

### S.1 Temporal convolution

Temporal convolution with a Gaussian kernel was employed to process the original OMI-NO<sub>2</sub> satellite retrievals.

$$O(t) = \sum_n [I(n) \cdot W(t-n)] / \sum_n W(t-n) \quad (1)$$

where  $O(t)$  is the output value on the  $t$ th day iterating through the whole study period,  $I(n)$  is the original OMI-NO<sub>2</sub> value on the  $n$ th day if available, and  $W(t-n)$  is the weight of  $I(n)$  in calculating  $O(t)$ .  $W(t-n)$  is determined by the Gaussian kernel function:

$$W(t-n) = \exp \left[ -\frac{(t-n)^2}{2\sigma^2} \right] \quad (2)$$

where  $\sigma$  is the standard deviation of the Gaussian function, which is set to 60 days based on the sensitivity analyses considering the input completeness and output smoothness.

### S.2 Algorithm of random forests<sup>1</sup>

For  $tree = 1$  to 500:

- Randomly draw a sample from the training data with replacement, and the sample size is the same as the training data;
- Grow a tree by starting with a single node, and then repeat the steps below until only one observation presents in each terminal node:
  - Randomly select one third of the predictors;
  - Find the split that reduces the squared error the most;

Average the predictions of all trees as the model output.

### S.3 Hourly-scaling approach

The random forest-spatiotemporal kriging (RF-STK) model was used to predict the hourly NO<sub>2</sub> concentrations when the Aura satellite passed, which were then scaled to daily concentrations.

The detailed procedures are as follows:

- (1) Train the RF-STK model to simulate the NO<sub>2</sub> for the overpass hour of the Aura satellite;
- (2) Use the RF-STK model to predict the hourly NO<sub>2</sub> for unmonitored areas;
- (3) Calculate the scaling factors (i.e., the ratio of observed hourly to daily NO<sub>2</sub>) for the monitoring sites;
- (4) Estimate the scaling factors for the unmonitored areas by using kriging interpolation;
- (5) Divide the hourly NO<sub>2</sub> predictions by the estimated scaling factor to get the daily NO<sub>2</sub> predictions for the unmonitored areas.

**Table S1** Coverage rates of OMI-NO<sub>2</sub> satellite retrievals across China (%)

| Year(s)   | Spring | Summer | Fall | Winter | Annual |
|-----------|--------|--------|------|--------|--------|
| 2013      | 68.0   | 78.0   | 68.5 | 51.7   | 66.6   |
| 2014      | 70.0   | 77.1   | 61.7 | 52.5   | 65.4   |
| 2015      | 65.3   | 76.7   | 62.8 | 49.5   | 63.7   |
| 2016      | 66.2   | 76.5   | 61.6 | 47.5   | 62.5   |
| 2013-2016 | 67.4   | 77.1   | 63.6 | 50.3   | 64.6   |

**Table S2** Correlation coefficient squares ( $R^2$ ) between the observed ambient NO<sub>2</sub> concentrations and the OMI satellite-retrieved vertical column density of the tropospheric NO<sub>2</sub>

| Temporal Resolution  | Level-2 | Level-3 | Level-3 Conv. <sup>a</sup> |
|----------------------|---------|---------|----------------------------|
| Day                  | 0.18    | 0.24    | 0.27                       |
| Month                | 0.26    | 0.38    | 0.42                       |
| Season               | 0.38    | 0.44    | 0.48                       |
| Year                 | 0.45    | 0.48    | 0.48                       |
| Spatial <sup>b</sup> | 0.53    | 0.53    | 0.52                       |

<sup>a</sup> OMI retrievals processed with the temporal convolution.

<sup>b</sup> Multiyear averages, i.e., no temporal resolution.

**Table S3** List of variable symbols and definitions

| Symbol  | Unit                     | Variable definition                                | Spatial <sup>a</sup> | Temporal <sup>a</sup> | Convolution <sup>b</sup> |
|---------|--------------------------|----------------------------------------------------|----------------------|-----------------------|--------------------------|
| OMI     | molecule/cm <sup>2</sup> | OMI-retrieved tropospheric NO <sub>2</sub> density | 0.25°×0.25°          | Day                   | Temporal                 |
| DOY     | -                        | Day of year                                        | -                    | -                     | -                        |
| YEAR    | -                        | Year                                               | -                    | -                     | -                        |
| EVP     | mm                       | Evaporation                                        | Point                | Day                   | -                        |
| PRE     | mm                       | Precipitation                                      | Point                | Day                   | -                        |
| PRS     | hPa                      | Atmospheric pressure                               | Point                | Day                   | -                        |
| RHU     | %                        | Relative humidity                                  | Point                | Day                   | -                        |
| SSD     | hour                     | Sunshine duration                                  | Point                | Day                   | -                        |
| TEM     | °C                       | Temperature                                        | Point                | Day                   | -                        |
| WIN     | m/s                      | Wind speed                                         | Point                | Day                   | -                        |
| PBLH    | km                       | Planetary boundary layer height                    | 0.625°×0.5°          | Day                   | -                        |
| ELV     | m                        | Elevation                                          | 90m×90m              | None                  | Spatial                  |
| NDVI    | -                        | Normalized Difference Vegetation Index             | 250m×250m            | 8 Days                | Spatial                  |
| POP     | people/km <sup>2</sup>   | Population density                                 | 30"×30"              | None                  | Spatial                  |
| LU10    | %                        | Cultivated land area                               | 30m×30m              | None                  | Spatial                  |
| LU20    | %                        | Forest area                                        | 30m×30m              | None                  | Spatial                  |
| LU30    | %                        | Grassland area                                     | 30m×30m              | None                  | Spatial                  |
| LU40    | %                        | Shrubland area                                     | 30m×30m              | None                  | Spatial                  |
| LU50    | %                        | Wetland area                                       | 30m×30m              | None                  | Spatial                  |
| LU60    | %                        | Waterbody area                                     | 30m×30m              | None                  | Spatial                  |
| LU80    | %                        | Artificial surface area                            | 30m×30m              | None                  | Spatial                  |
| LU90    | %                        | Bareland area                                      | 30m×30m              | None                  | Spatial                  |
| LU100   | %                        | Permanent frozen land area                         | 30m×30m              | None                  | Spatial                  |
| LU255   | %                        | Sea area                                           | 30m×30m              | None                  | Spatial                  |
| ROAD    | km/grid                  | Road density                                       | Polyline             | None                  | Spatial                  |
| eBC     | Mg/grid                  | Emission of black carbon                           | 0.25°×0.25°          | Month                 | Spatial                  |
| eCO     | Mg/grid                  | Emission of CO                                     | 0.25°×0.25°          | Month                 | Spatial                  |
| eCO2    | Mg/grid                  | Emission of CO <sub>2</sub>                        | 0.25°×0.25°          | Month                 | Spatial                  |
| eNH3    | Mg/grid                  | Emission of NH <sub>3</sub>                        | 0.25°×0.25°          | Month                 | Spatial                  |
| eNOx    | Mg/grid                  | Emission of NO <sub>2</sub> and NO                 | 0.25°×0.25°          | Month                 | Spatial                  |
| eOC     | Mg/grid                  | Emission of organic carbon                         | 0.25°×0.25°          | Month                 | Spatial                  |
| ePM25   | Mg/grid                  | Emission of PM <sub>2.5</sub>                      | 0.25°×0.25°          | Month                 | Spatial                  |
| ePMcoar | Mg/grid                  | Emission of PM-coarse                              | 0.25°×0.25°          | Month                 | Spatial                  |
| eSO2    | Mg/grid                  | Emission of SO <sub>2</sub>                        | 0.25°×0.25°          | Month                 | Spatial                  |
| eVOC    | Mg/grid                  | Emission of VOC                                    | 0.25°×0.25°          | Month                 | Spatial                  |

<sup>a</sup> Spatial or temporal resolution of raw data.<sup>b</sup> Temporal: OMI is processed with the temporal convolution. Spatial: these variables have accompanying variables processed with the spatial convolution.

**Table S4** Descriptive statistics of the meteorological variables

| Variable             | Number of observations | Unit | Mean | Standard deviation | Median | Interquartile range |
|----------------------|------------------------|------|------|--------------------|--------|---------------------|
| Evaporation          | 1202560                | mm   | 2.7  | 2                  | 2.4    | 2.6                 |
| Precipitation        | 1140852                | mm   | 2.7  | 9.5                | 0      | 0.6                 |
| Atmospheric pressure | 1219978                | hPa  | 924  | 108                | 969    | 120                 |
| Relative humidity    | 1219982                | %    | 66   | 20                 | 69     | 28                  |
| Sunshine duration    | 1219032                | hour | 5.9  | 4.1                | 6.8    | 7.7                 |
| Temperature          | 1220028                | °C   | 12.5 | 11.9               | 14.4   | 16.9                |
| Wind speed           | 1219439                | m/s  | 2.2  | 1.4                | 1.8    | 1.4                 |

**Table S5** Performance of the random-forest-spatiotemporal-kriging model (RFSTK) in predicting the ambient NO<sub>2</sub> concentrations for China during 2013-2016

| Metric <sup>a</sup> | Daily | Monthly | Seasonal | Annual | Spatial |
|---------------------|-------|---------|----------|--------|---------|
| $R^2$               | 0.62  | 0.65    | 0.68     | 0.68   | 0.73    |
| RMSE                | 13.3  | 10.2    | 9.0      | 7.7    | 6.5     |
| Slope               | 0.67  | 0.71    | 0.73     | 0.72   | 0.77    |
| RPE                 | 39.5% | 30.1%   | 26.2%    | 22.4%  | 19.9%   |
| MFB                 | 0.066 | 0.044   | 0.037    | 0.029  | 0.027   |
| MFE                 | 0.32  | 0.25    | 0.22     | 0.19   | 0.17    |
| MNB                 | 0.27  | 0.19    | 0.18     | 0.07   | 0.06    |
| MNE                 | 0.48  | 0.36    | 0.34     | 0.21   | 0.19    |

<sup>a</sup>  $R^2$ : coefficient of determination; RMSE: root mean square error ( $\mu\text{g}/\text{m}^3$ ); RPE: relative prediction error; MFB: mean fractional bias; MFE: mean fractional error; MNB: mean normalized bias; MNE: mean normalized error.

**Table S6** Prediction performance for data points with or without OMI-NO<sub>2</sub> values prior to imputation by temporal convolution<sup>a</sup>

| OMI-NO <sub>2</sub> | $R^2$ | Slope | RMSE | RPE | MFB  | MFE  | MNB  | MNE  |
|---------------------|-------|-------|------|-----|------|------|------|------|
| Available           | 0.61  | 0.67  | 13.2 | 40% | 0.07 | 0.32 | 0.27 | 0.48 |
| Missing             | 0.62  | 0.67  | 13.6 | 39% | 0.06 | 0.32 | 0.26 | 0.47 |

<sup>a</sup>  $R^2$ : coefficient of determination; RMSE: root mean square error ( $\mu\text{g}/\text{m}^3$ ); RPE: relative prediction error; MFB: mean fractional bias; MFE: mean fractional error; MNB: mean normalized bias; MNE: mean normalized error. These metrics are evaluated in the 10-fold cross-validation. Approximately 65% of the data had OMI-NO<sub>2</sub> values prior to the imputation.



**Table S7** Number of NO<sub>2</sub> monitoring sites within each cross-validation fold for each climate region

| Climate Region <sup>a</sup> | Stratified Sampling <sup>b</sup> | Fold |    |    |    |    |    |     |    |    |     |
|-----------------------------|----------------------------------|------|----|----|----|----|----|-----|----|----|-----|
|                             |                                  | #1   | #2 | #3 | #4 | #5 | #6 | #7  | #8 | #9 | #10 |
| Qinghai-Tibet Plateau       | Y                                | 4    | 4  | 4  | 4  | 4  | 3  | 3   | 3  | 3  | 3   |
|                             | N                                | 3    | 2  | 3  | 4  | 5  | 2  | 2   | 6  | 2  | 6   |
| Subtropical Monsoon         | Y                                | 87   | 87 | 87 | 87 | 87 | 86 | 86  | 86 | 86 | 86  |
|                             | N                                | 82   | 85 | 75 | 77 | 88 | 86 | 100 | 85 | 89 | 98  |
| Temperate Continental       | Y                                | 7    | 6  | 6  | 6  | 6  | 6  | 6   | 6  | 6  | 6   |
|                             | N                                | 9    | 5  | 7  | 7  | 7  | 7  | 5   | 8  | 2  | 4   |
| Temperate Monsoon           | Y                                | 66   | 66 | 66 | 66 | 66 | 66 | 66  | 65 | 65 | 65  |
|                             | N                                | 68   | 70 | 79 | 72 | 63 | 65 | 57  | 61 | 67 | 55  |
| Tropical Monsoon            | Y                                | 4    | 4  | 4  | 4  | 4  | 4  | 4   | 4  | 4  | 3   |
|                             | N                                | 4    | 4  | 2  | 6  | 3  | 6  | 2   | 5  | 5  | 2   |

<sup>a</sup> Please refer to Figure S10 for the map of these climate regions.

<sup>b</sup> Y means random sampling stratified by climate regions, with cross-validation results of  $R^2=0.61$ , Slope=0.67, RMSE=13.4, RPE=40%, MFB=0.06, MFE=0.32, MNB=0.26, MNE=0.48; and N represents non-stratified random sampling, with cross-validation results of  $R^2=0.62$ , Slope=0.67, RMSE=13.3, RPE=40%, MFB=0.07, MFE=0.32, MNB=0.27, MNE=0.48.

**Table S8** Comparisons of the statistical models in predicting daily NO<sub>2</sub> for China during 2013-2016 with the same setting of 10-fold-cross-validation

| Metric <sup>a</sup> | LR <sup>b</sup> | STK <sup>b</sup> | LR-STK <sup>b</sup> | RF <sub>0</sub> <sup>b</sup> | RF <sup>b</sup> | RF-STK <sup>b</sup> | RF-STK <sub>h</sub> <sup>b</sup> |
|---------------------|-----------------|------------------|---------------------|------------------------------|-----------------|---------------------|----------------------------------|
| $R^2$               | 0.38            | 0.60             | <b>0.64</b>         | 0.60                         | 0.61            | 0.62                | 0.48                             |
| Slope               | 0.38            | 0.57             | 0.62                | 0.63                         | 0.64            | <b>0.67</b>         | <b>0.67</b>                      |
| RMSE                | 16.8            | 13.5             | <b>12.9</b>         | 13.5                         | 13.4            | 13.3                | 16.0                             |
| RPE                 | 50%             | 40%              | <b>38%</b>          | 40%                          | 40%             | 40%                 | 48%                              |
| MFB                 | 0.11            | 0.10             | 0.08                | 0.09                         | 0.08            | 0.07                | <b>0.05</b>                      |
| MFE                 | 0.40            | 0.33             | <b>0.31</b>         | 0.33                         | 0.32            | 0.32                | 0.36                             |
| MNB                 | 0.40            | 0.34             | 0.29                | 0.30                         | 0.29            | <b>0.27</b>         | 0.28                             |
| MNE                 | 0.64            | 0.53             | 0.49                | 0.50                         | 0.49            | <b>0.48</b>         | 0.53                             |

<sup>a</sup>  $R^2$ : coefficient of determination; RMSE: root mean square error ( $\mu\text{g}/\text{m}^3$ ); RPE: relative prediction error; MFB: mean fractional bias; MFE: mean fractional error; MNB: mean normalized bias; MNE: mean normalized error. Bold: the best performance of each evaluation metric. Lower values are better for each metric except  $R^2$  and slope.

<sup>b</sup> LR: Linear Regression model; STK: Spatiotemporal Kriging model; LR-STK: Linear Regression-Spatiotemporal Kriging hybrid model; RF<sub>0</sub>: Random Forest model without variable selection; RF: Random Forest model with variable selection; RF-STK: Random Forest-Spatiotemporal Kriging model; RF-STK<sub>h</sub>: Random Forest-Spatiotemporal Kriging model with hourly scaling.

**Table S9** Performance of the previous statistical models in predicting NO<sub>2</sub>

| Reference     | Model                                 | Study Area                        | Study Period | Validation                                    | Metric                                        |
|---------------|---------------------------------------|-----------------------------------|--------------|-----------------------------------------------|-----------------------------------------------|
| <sup>2</sup>  | Satellite-based LUR; lasso            | Australia                         | 2006-2011    | Fitting                                       | $R^2=0.81$ (annual)<br>$R^2=0.76$ (monthly)   |
| <sup>3</sup>  | Mixed effects model                   | New England region, United States | 2005-2010    | 10-fold sample-based cross-validation         | $R^2=0.79$ (daily)                            |
| <sup>4</sup>  | LUR                                   | Canada                            | 2006         | Fitting                                       | $R^2=0.73$ (spatial)                          |
| <sup>5</sup>  | LUR                                   | Western Europe                    | 2005-2007    | Fitting                                       | $R^2=0.50$ (spatial)                          |
| <sup>6</sup>  | LUR                                   | Netherlands                       | 2007         | Fitting                                       | $R^2=0.84$ (annual)                           |
| <sup>7</sup>  | LUR                                   | Changsha, China                   | 2010         | Leave-25%-out-validation                      | $R^2=0.67$ (annual)                           |
| <sup>8</sup>  | LUR                                   | Shanghai, China                   | 2008-2011    | Leave-one-out-cross-validation                | $R^2=0.75$ (annual)                           |
| <sup>9</sup>  | LUR                                   | Pearl River Delta, China          | 2013-2014    | Leave-one-out-cross-validation                | $R^2=0.71$ (annual)                           |
| <sup>10</sup> | LUR                                   | Western Europe                    | 2009-2010    | Hold-out-validation on 20% of monitoring site | $R^2=0.60$ (annual)                           |
| <sup>11</sup> | LUR                                   | Seoul, Korea                      | 2003         | Fitting                                       | $R^2=0.95\sim0.98$ (seasonal)                 |
| <sup>12</sup> | LUR; Lasso regression                 | Global                            | 2011         | Bootstrap 10% cross-validation                | $R^2=0.53$ (annual)                           |
| <sup>13</sup> | LUR; monthly scaling                  | Contiguous United States          | 2000-2010    | Fitting                                       | $R^2=0.79$ (spatial);<br>$R^2=0.84$ (monthly) |
| <sup>14</sup> | LUR-UK; partial least square          | Contiguous United States          | 1990-2012    | 20-fold site-based cross-validation           | $R^2=0.85$ (annual)                           |
| <sup>15</sup> | LUR; Stepwise multivariate regression | Contiguous United States          | 2006         | Leave-10%-out validation                      | $R^2=0.76$ (annual)                           |

**Table S10** Comparisons of the random forest and the linear regression models in predicting NO<sub>2</sub> for temporal extrapolation<sup>a</sup>

| Metric <sup>b</sup> | Daily NO <sub>2</sub> |               | Spatial NO <sub>2</sub> <sup>c</sup> |               |
|---------------------|-----------------------|---------------|--------------------------------------|---------------|
|                     | Linear Regression     | Random Forest | Linear Regression                    | Random Forest |
| $R^2$               | 0.39                  | <b>0.56</b>   | 0.61                                 | <b>0.83</b>   |
| Slope               | 0.39                  | <b>0.54</b>   | 0.62                                 | <b>0.81</b>   |
| RMSE                | 16.8                  | <b>14.3</b>   | 7.9                                  | <b>5.2</b>    |
| RPE                 | 50%                   | <b>42%</b>    | 24%                                  | <b>16%</b>    |
| MFB                 | 0.10                  | <b>0.08</b>   | 0.03                                 | <b>0.01</b>   |
| MFE                 | 0.39                  | <b>0.33</b>   | 0.21                                 | <b>0.13</b>   |
| MNB                 | 0.38                  | <b>0.29</b>   | 0.08                                 | <b>0.03</b>   |
| MNE                 | 0.63                  | <b>0.50</b>   | 0.24                                 | <b>0.14</b>   |

<sup>a</sup> The two models are trained with the data of 2014 and 2015, and then are used to make predictions for 2013 and 2016. The two models have the same set of predictor variables.

<sup>b</sup>  $R^2$ : coefficient of determination; RMSE: root mean square error ( $\mu\text{g}/\text{m}^3$ ); RPE: relative prediction error; MFB: mean fractional bias; MFE: mean fractional error; MNB: mean normalized bias; MNE: mean normalized error. Bold: the best performance of each evaluation metric. Lower values are better for each metric except  $R^2$  and slope.

<sup>c</sup> Two-year averages, i.e., no temporal resolution.

**Table S11** Population-weighted ambient NO<sub>2</sub> concentrations (mean ± standard deviation; µg/m<sup>3</sup>) and temporal trends (µg/m<sup>3</sup>/year) during 2013-2016 for the main economic zones in China

| Economic Zone <sup>a</sup> | Spring      | Summer     | Fall       | Winter      | Annual      | Trend | Trend 95% CI   | Trend <i>P</i> |
|----------------------------|-------------|------------|------------|-------------|-------------|-------|----------------|----------------|
| Beijing-Tianjin Metro      | 46.8 ± 7.4  | 35.5 ± 6.2 | 54.1 ± 7.4 | 62.0 ± 7.1  | 49.5 ± 6.7  | -0.61 | (-1.82, 0.60)  | =0.32          |
| Pearl River Delta          | 41.7 ± 9.1  | 29.4 ± 6.8 | 39.3 ± 7.8 | 49.9 ± 9.4  | 40.1 ± 7.9  | -1.37 | (-2.19, -0.55) | <0.01          |
| Sichuan Basin              | 30.4 ± 10.9 | 23.6 ± 9.3 | 29.6 ± 9.9 | 38.0 ± 10.9 | 30.4 ± 10.1 | -1.10 | (-1.44, -0.76) | <0.01          |
| Yangtze River Delta        | 40.6 ± 8.2  | 28.3 ± 6.0 | 39.8 ± 7.2 | 50.2 ± 8.5  | 39.7 ± 7.3  | -1.03 | (-1.62, -0.44) | <0.01          |

<sup>a</sup> The four economic zones are located in North, East, South, and Southwest China, respectively.

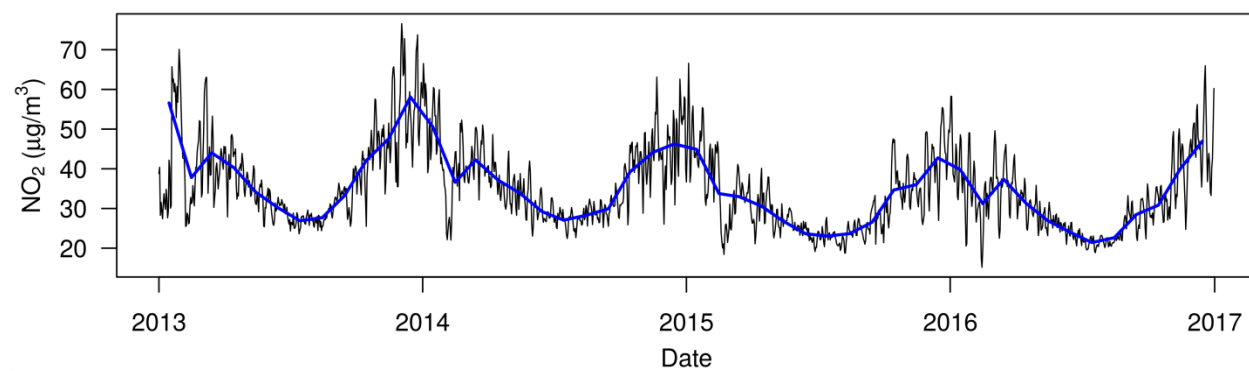

**Figure S1.** Average daily (black line) and monthly (blue line) NO<sub>2</sub> concentrations across all the monitoring sites for China during 2013-2016.

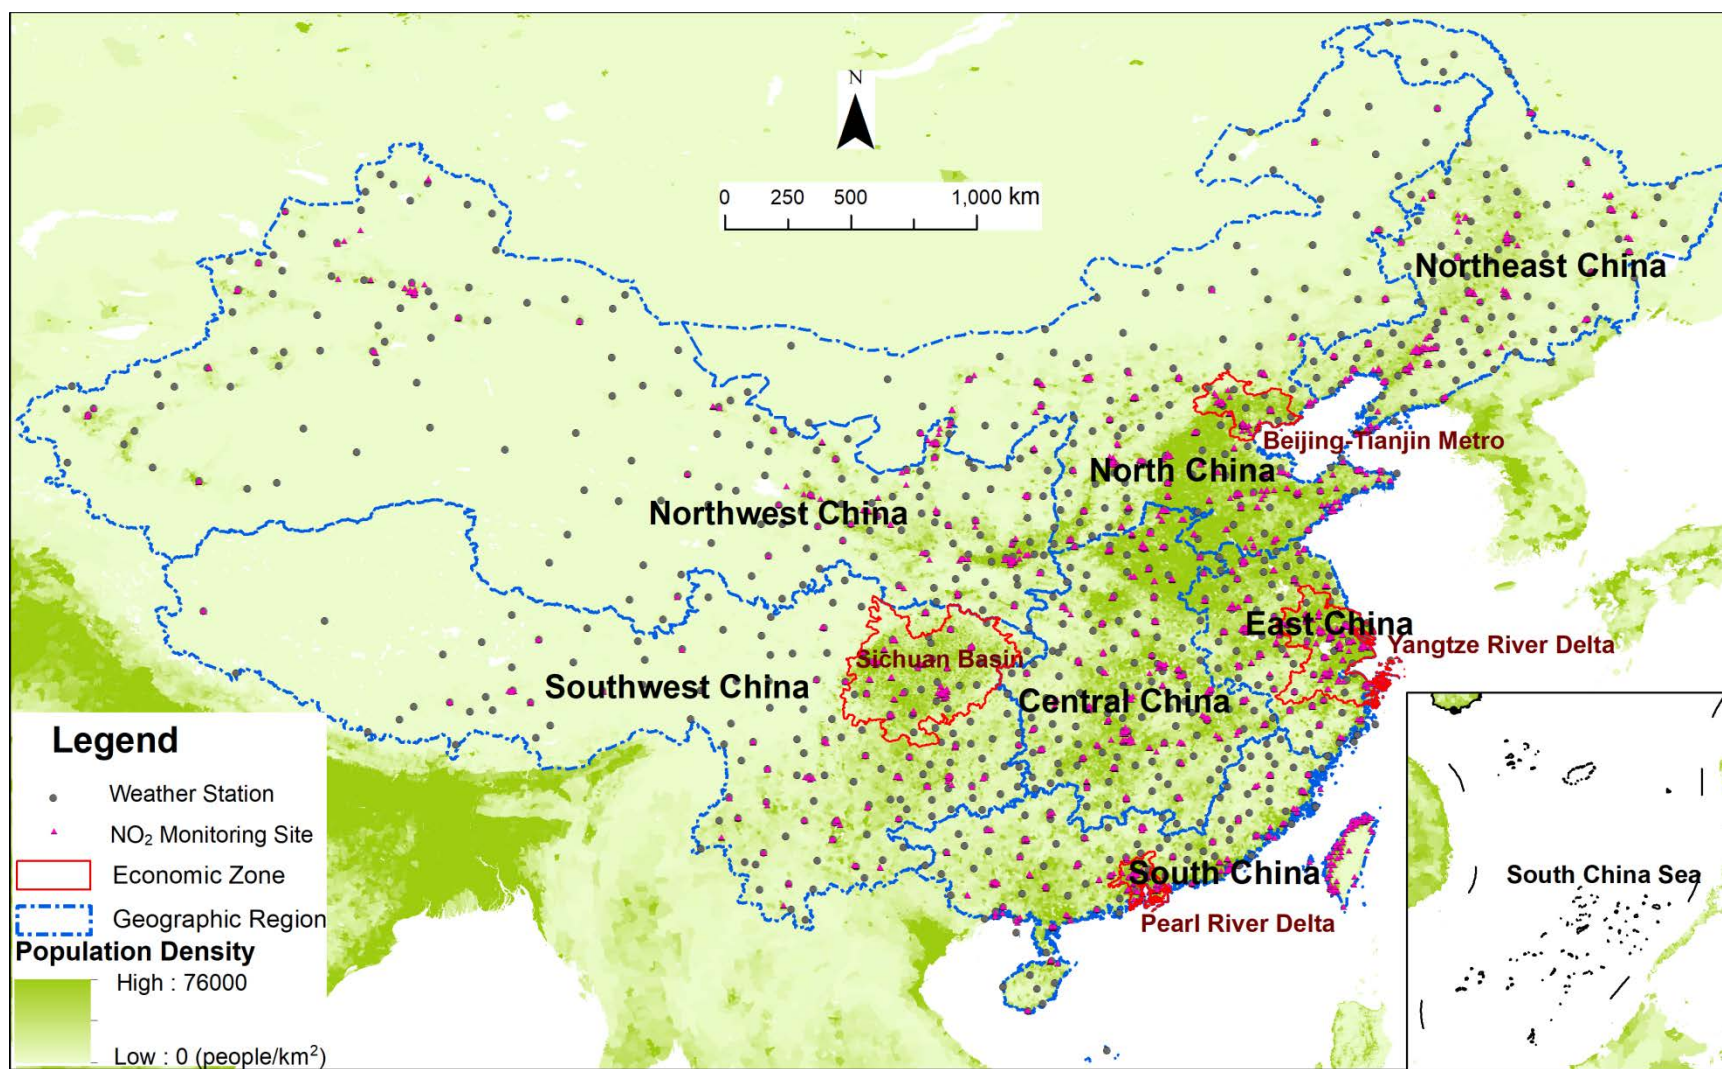

**Figure S2.** Spatial distribution of the NO<sub>2</sub> monitoring sites in China during 2013-2016. The basemap of population density data for 2015 is obtained from the Gridded Population of the World (GPWv4; 30 arc-second resolution).<sup>16</sup>

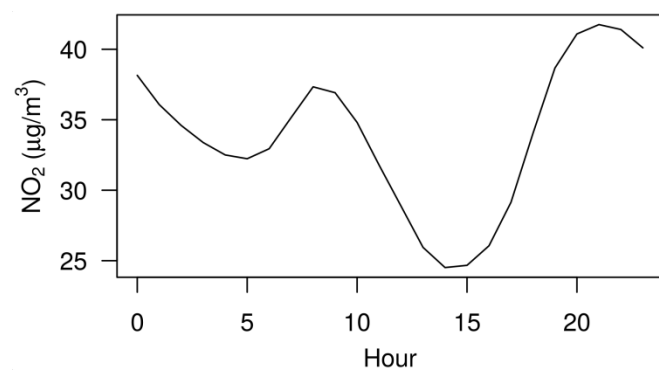

**Figure S3.** Average diurnal pattern in NO<sub>2</sub> concentrations across all the monitoring sites for China during 2013-2016. Two peaks appeared at 8am and 21pm.



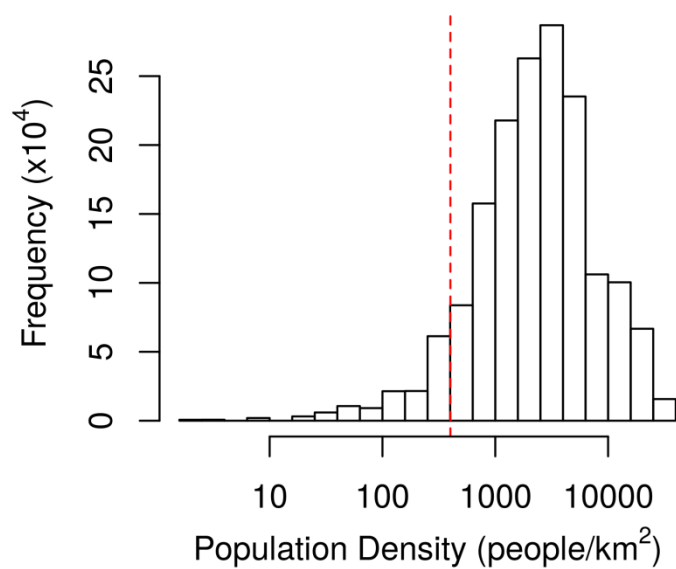

**Figure S4.** Frequency distributions of the numbers of NO<sub>2</sub> observations by population density. The population density of 400 people/km<sup>2</sup> is indicated by the red line.

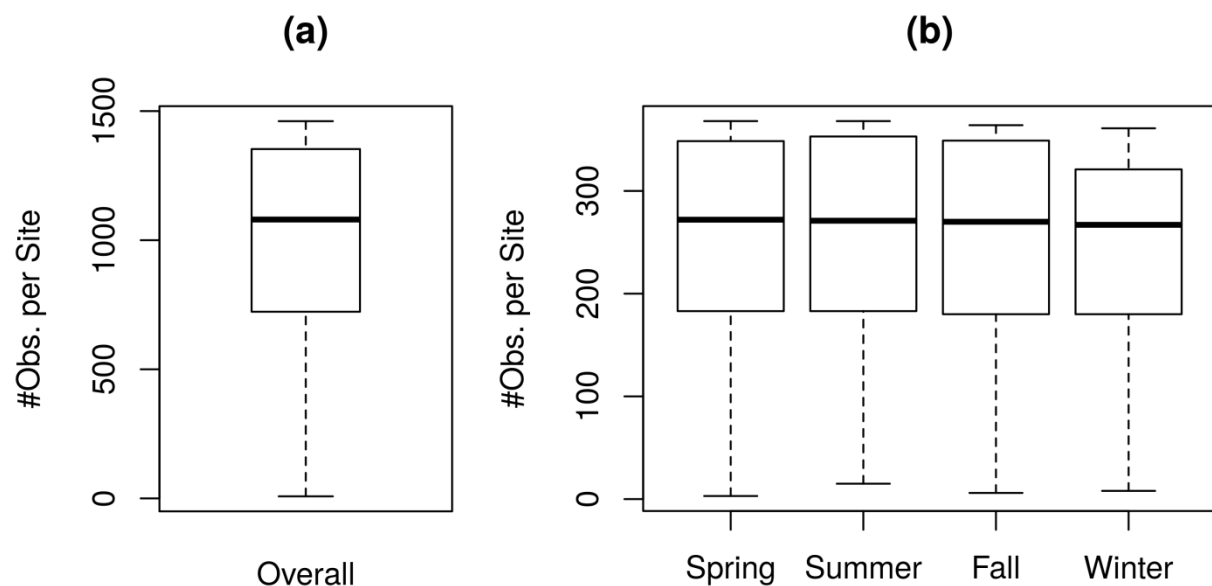

**Figure S5.** (a) Overall and (b) seasonal number of NO<sub>2</sub> observations per monitoring site during 2013-2016 for China. The overall mean $\pm$ standard deviation was 1008 $\pm$ 344. The seasonal mean $\pm$ standard deviation values were 258 $\pm$ 83, 258 $\pm$ 83, 260 $\pm$ 85, and 246 $\pm$ 79 for spring, summer, fall, and winter, respectively.

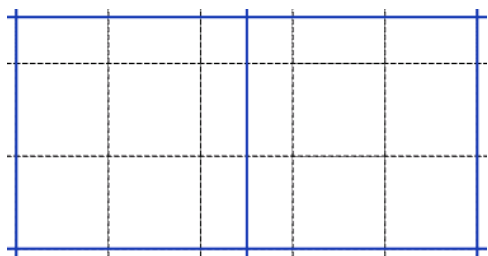

**Figure S6.** Overlay of the 0.25° grid (blue line) on the 0.1° grid (black dashed line).

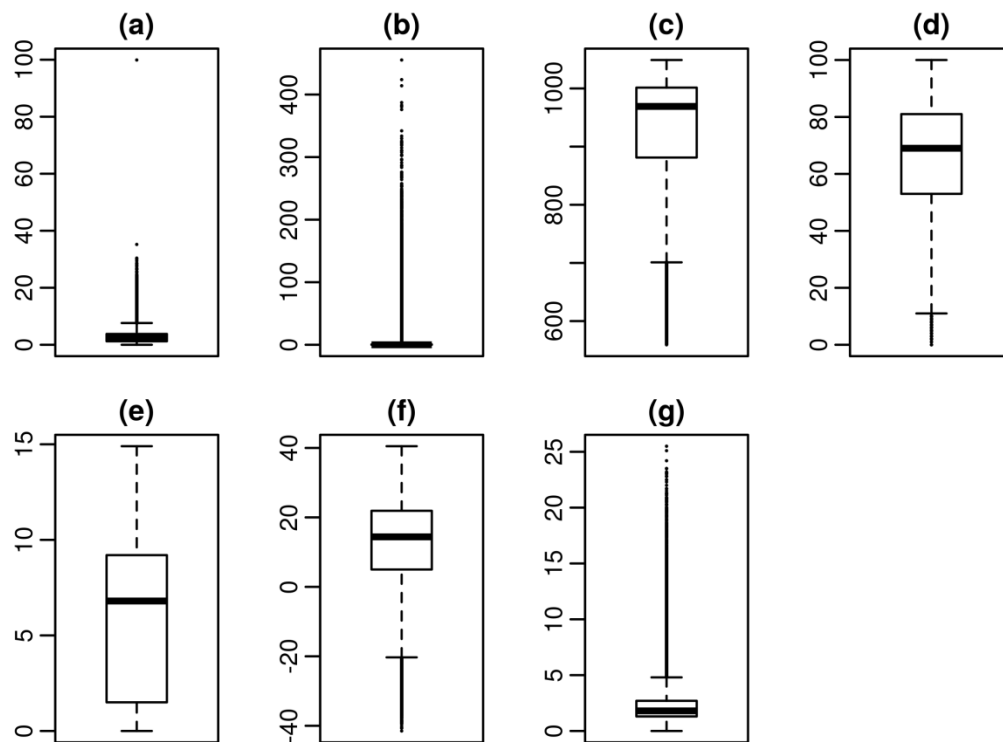

**Figure S7.** Boxplots of the meteorological variables: (a) evaporation (mm), (b) precipitation (mm), (c) atmospheric pressure (hPa), (d) relative humidity (%), (e) sunshine duration (hour), (f) temperature (°C), and (g) wind speed (m/s).

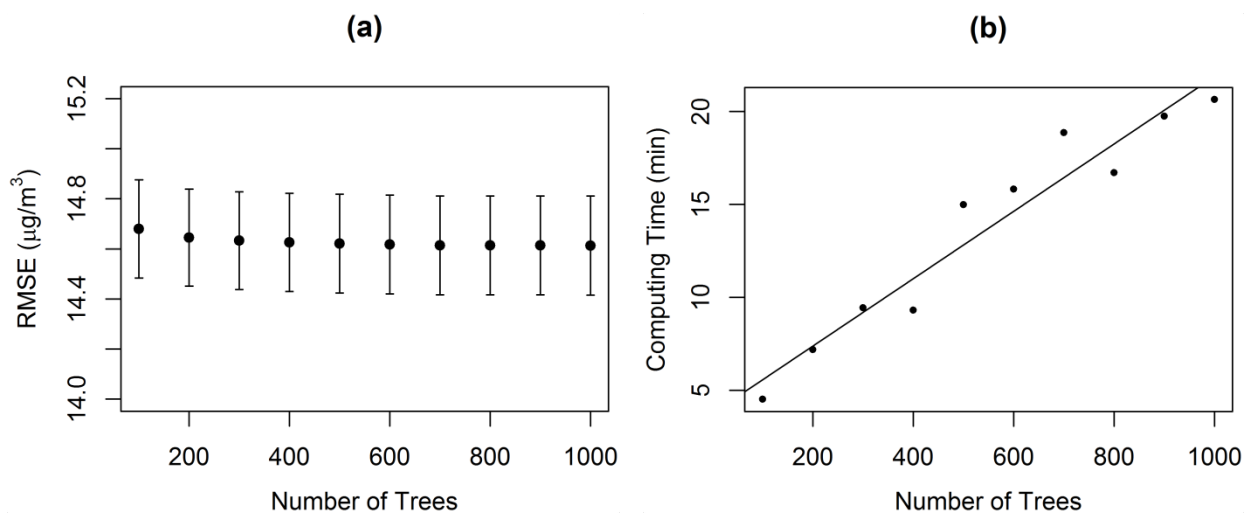

**Figure S8.** (a) Root mean square error (RMSE) as a function of the number of trees for the random forest model with the selected predictors. The RMSE is evaluated with 10-fold cross-validation on a random subset (100,000 samples) of the training data. The error bars represent the standard errors across the 10 folds. (b) Computing time for different numbers of trees in this evaluation, with a fitted regression line.

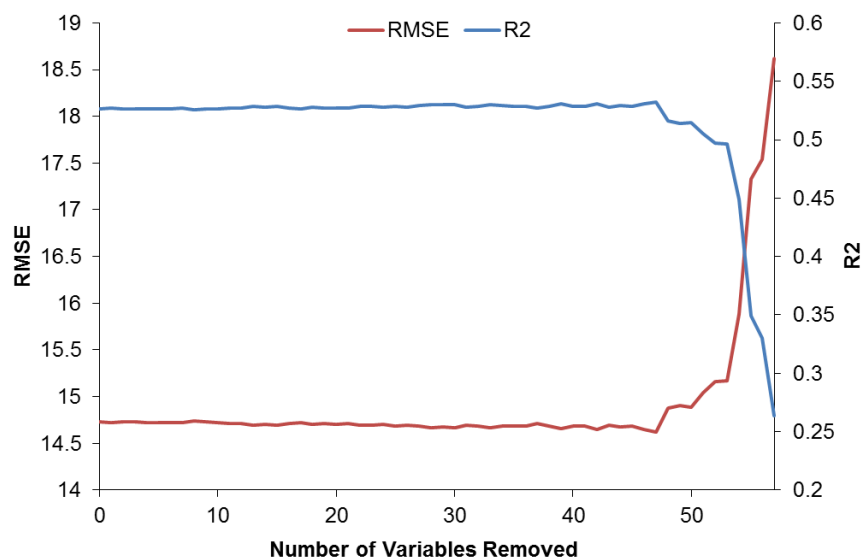

**Figure S9.** Evolution of cross-validation RMSE ( $\mu\text{g}/\text{m}^3$ ) and  $R^2$  for the random forest submodels through the variable selection process. Refer to Table S3 for the detailed descriptions of the variables.

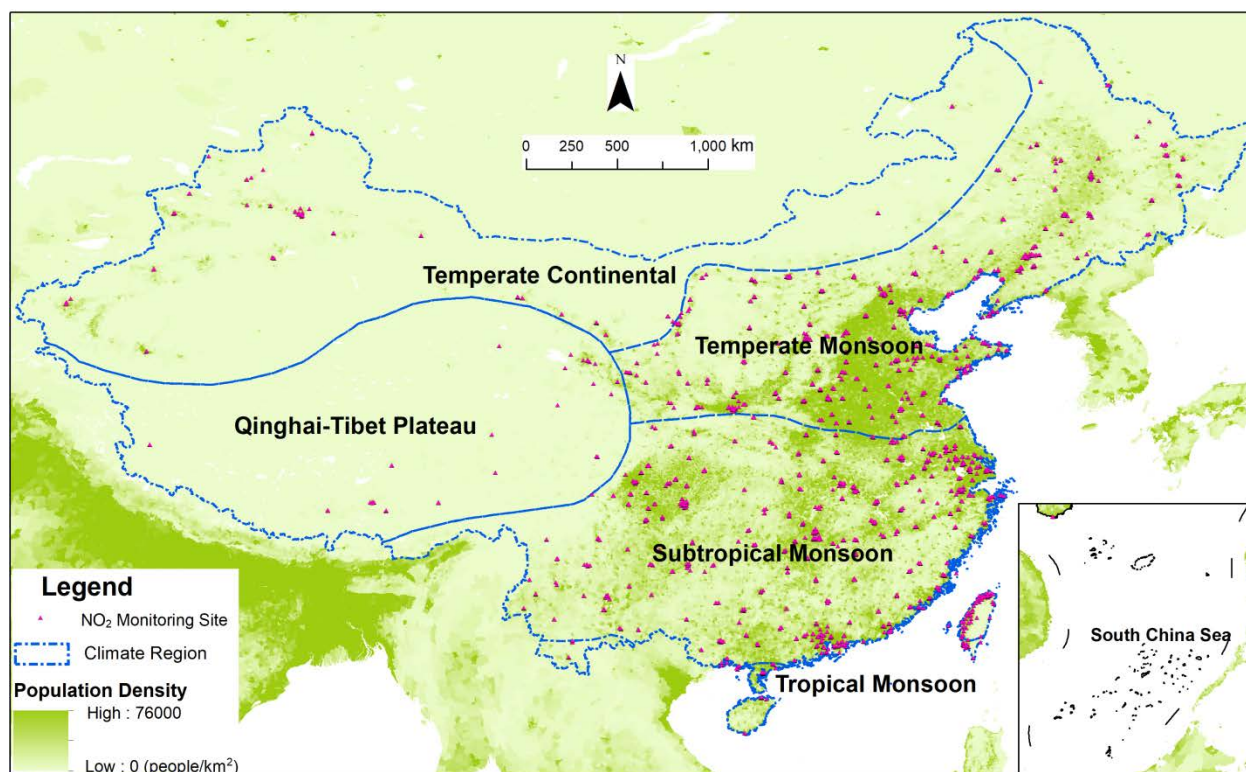

**Figure S10.** Major climate regions of China.

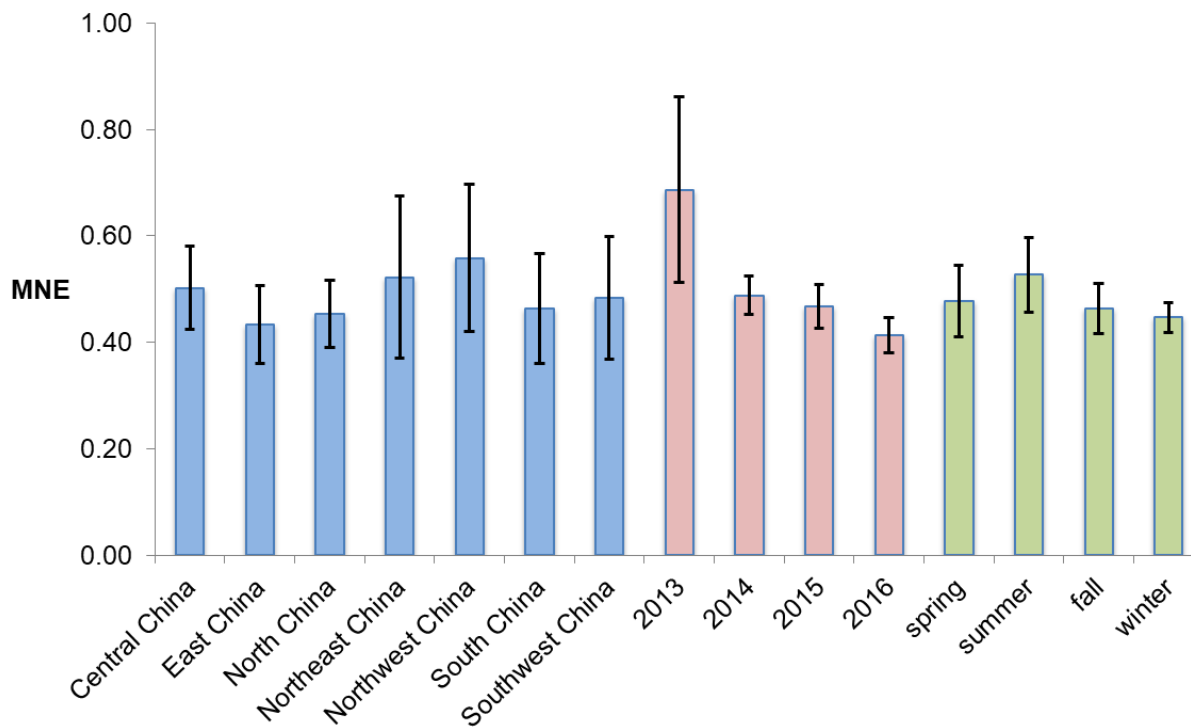

**Figure S11.** Performance of the random-forest-spatiotemporal-kriging (RF-STK) model in predicting daily  $\text{NO}_2$  by regions, years, and seasons. The mean and standard deviation of the mean normalized error (MNE) over all of the 10 cross-validation folds are presented. The numbers of monitoring sites in 2013, 2014, 2015, and 2016 are 744, 1022, 1612, and 1604, respectively. The annual average numbers of monitoring sites in Central, East, North, Northeast, Northwest, South, and Southwest China are 173, 200, 256, 125, 112, 239, and 140, respectively.



(a) Random Forest

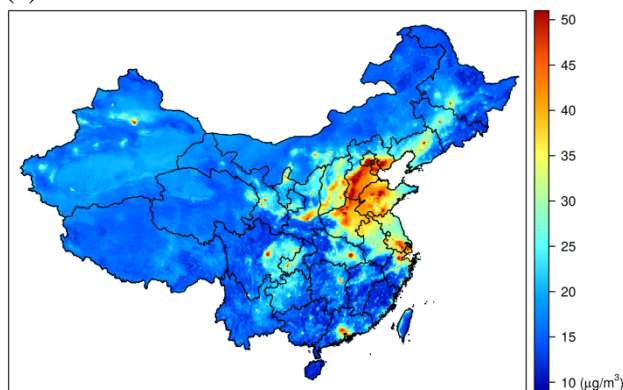

(b) Random Forest-Spatiotemporal Kriging

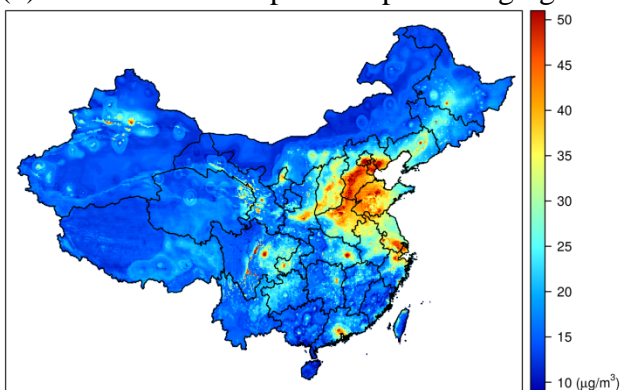

**Figure S12.** Average NO<sub>2</sub> during 2013-2016 predicted by (a) the random forest model and (b) the random-forest-spatiotemporal-kriging model.

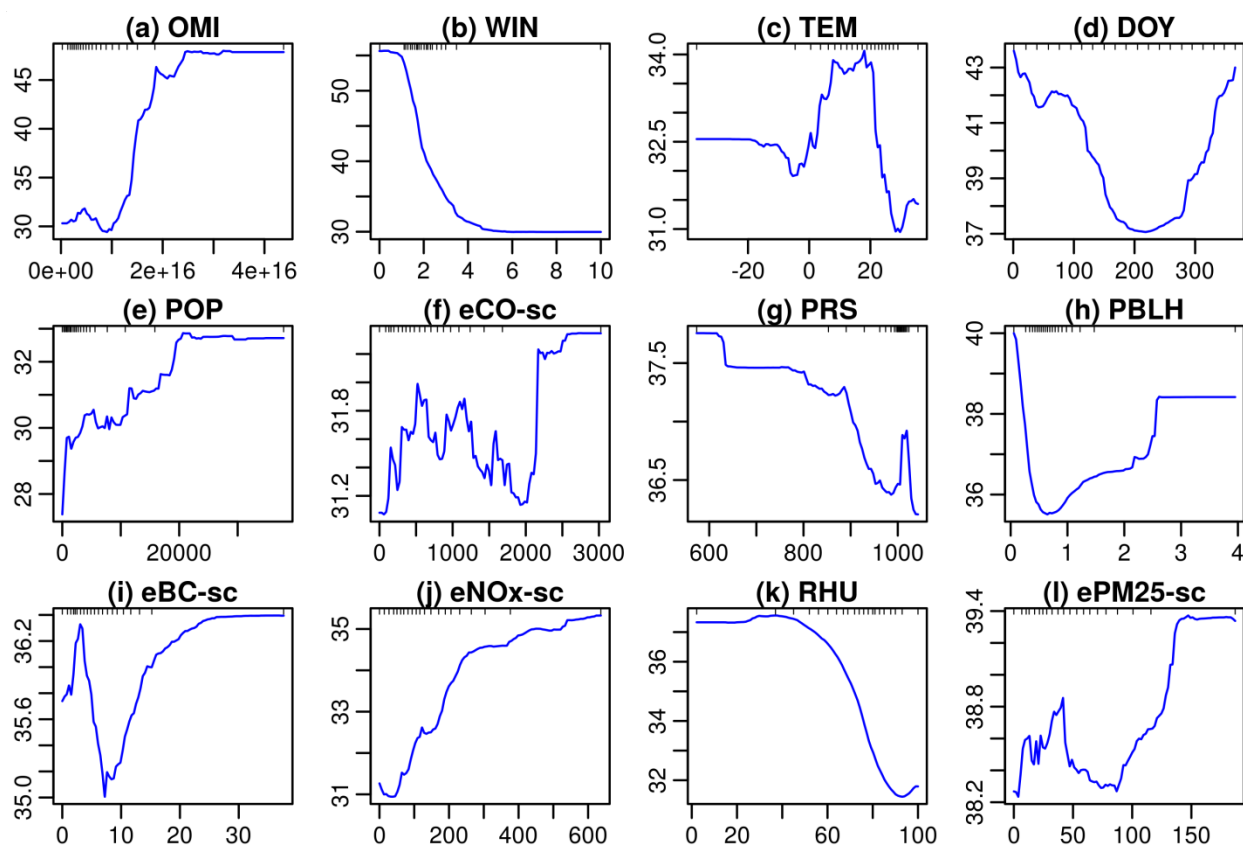

**Figure S13.** Partial dependence plots for the random forest model, indicating the effects of the predictor variables (a) OMI, (b) WIN, (c) TEM, (d) DOY, (e) POP, (f) eCO-sc, (g) PRS, (h) PBLH, (i) eBC-sc, (j) eNOx-sc, (k) RHU, and (l) ePM25-sc on the NO<sub>2</sub> predictions. The rug plot indicates the data density. Note that the partial dependence estimation tends to be unreliable at the two ends of horizontal axis due to their low data densities. Refer to Table S3 for the descriptions of the predictor variables.

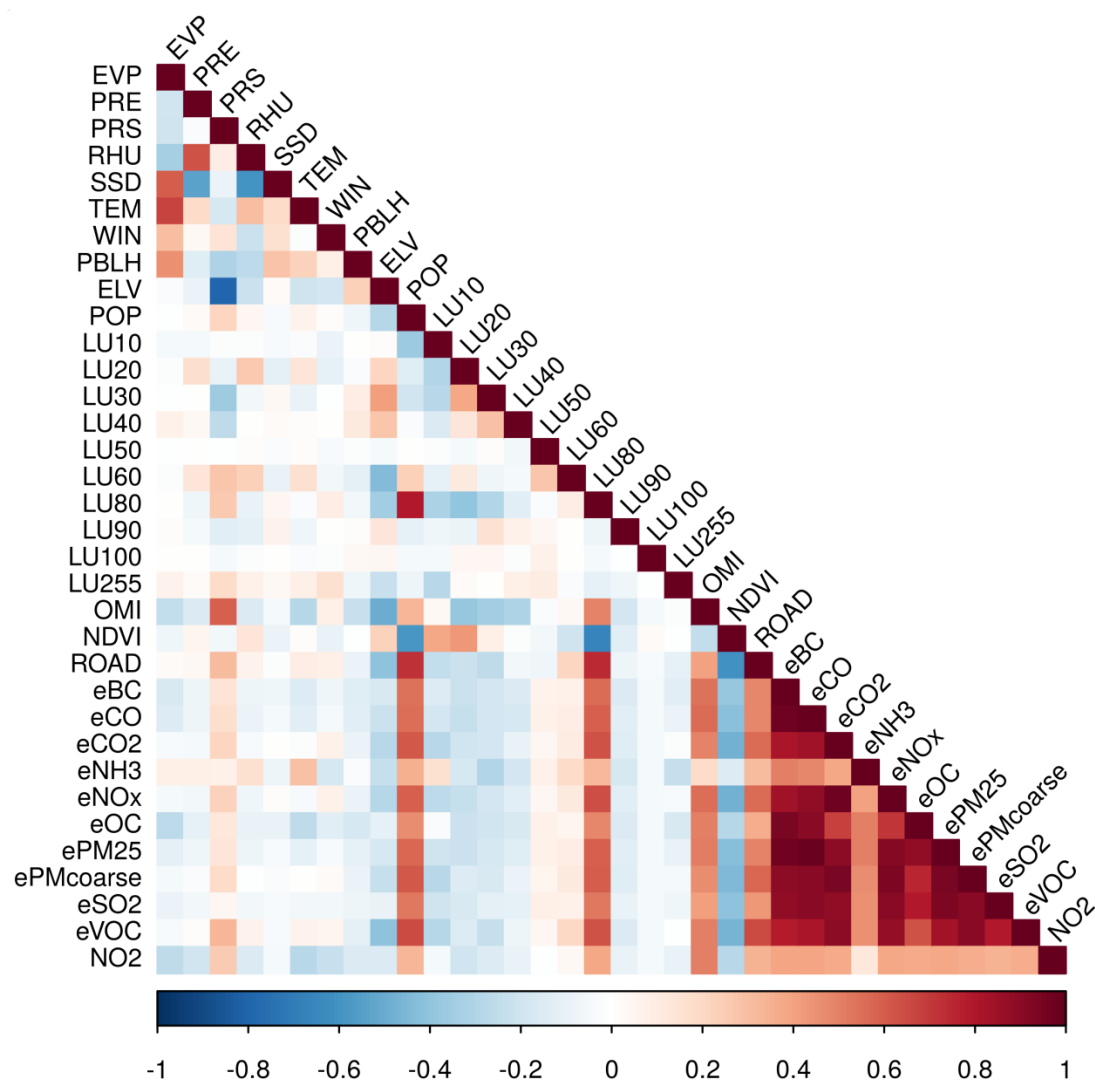

**Figure S14.** Correlations among the geographic factors and NO<sub>2</sub>. The Spearman's rank correlation coefficients are used due to the prevalence of nonlinearity. Refer to Table S3 for the detailed descriptions of the variables.

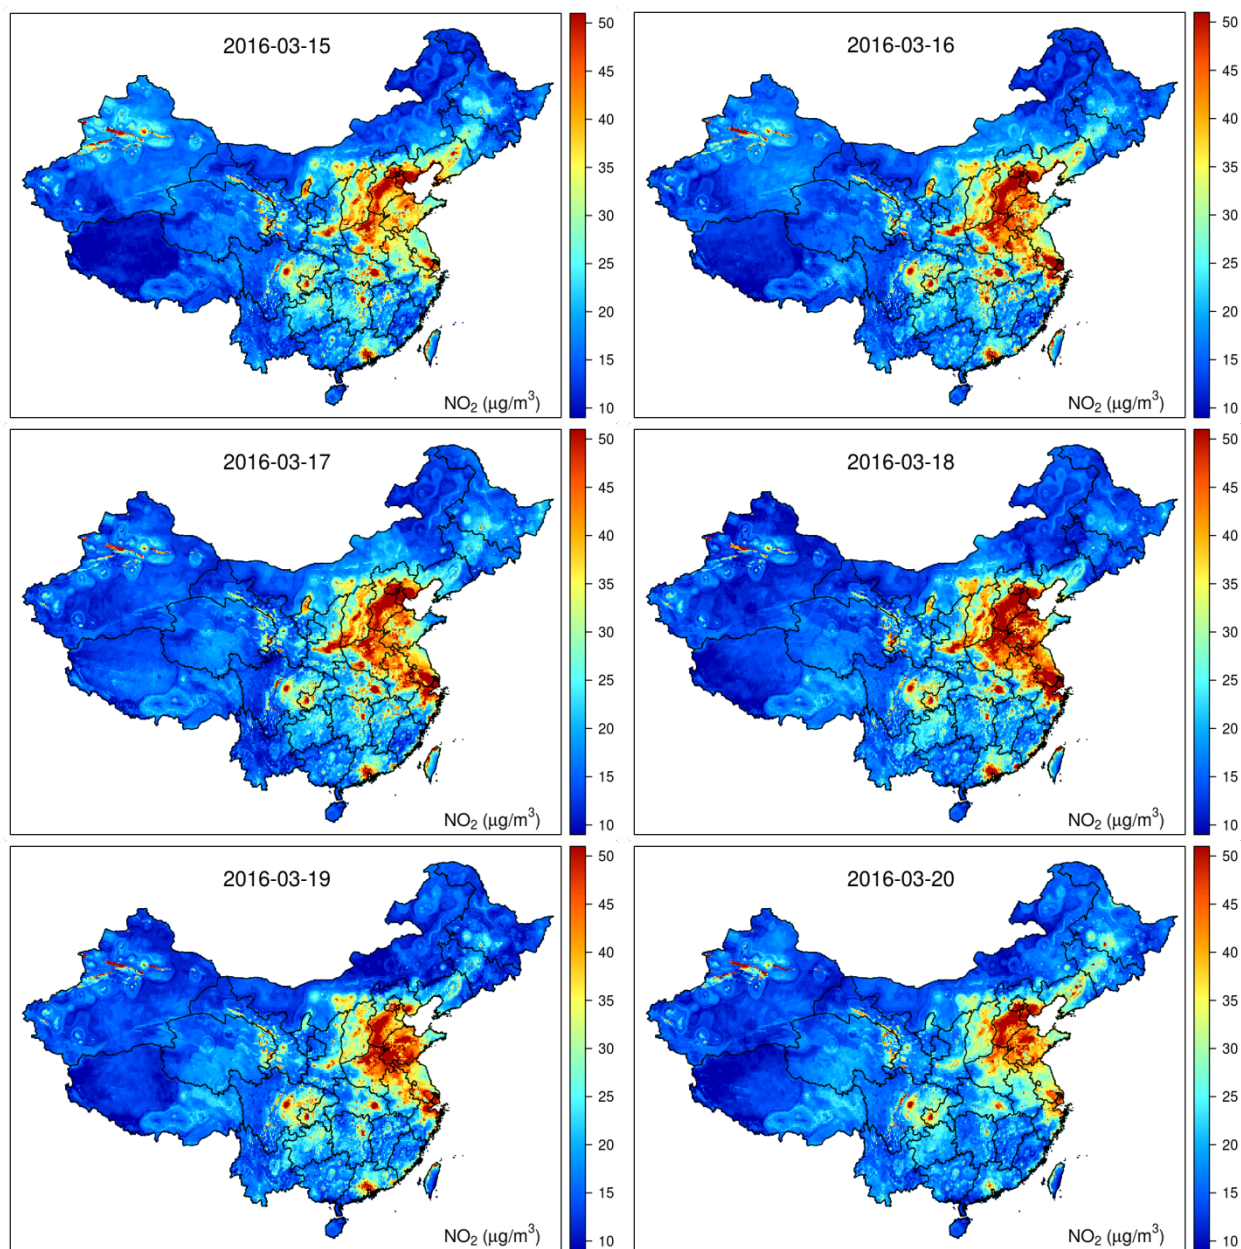

**Figure S15.** Daily surfaces of the ambient NO<sub>2</sub> concentrations across China from March 15 to March 20, 2016, which are examples of daily predictions by the random forest-spatiotemporal kriging (RF-STK) model.

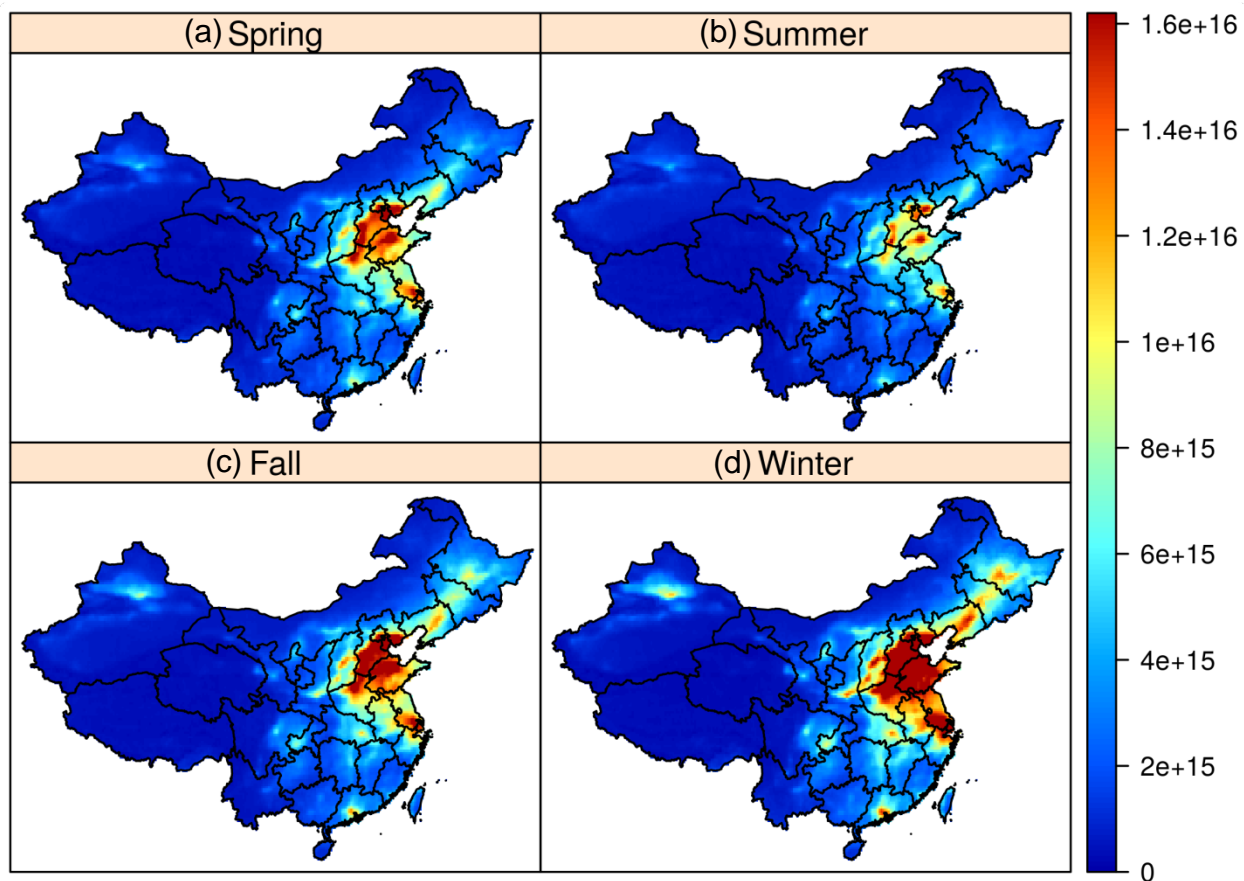

**Figure S16.** Vertical column density (molecules/cm<sup>2</sup>) of tropospheric NO<sub>2</sub> retrieved from the OMI Level-3 product and processed by temporal convolution for (a) spring, (b) summer, (c) fall, and (d) winter during 2013-2016.

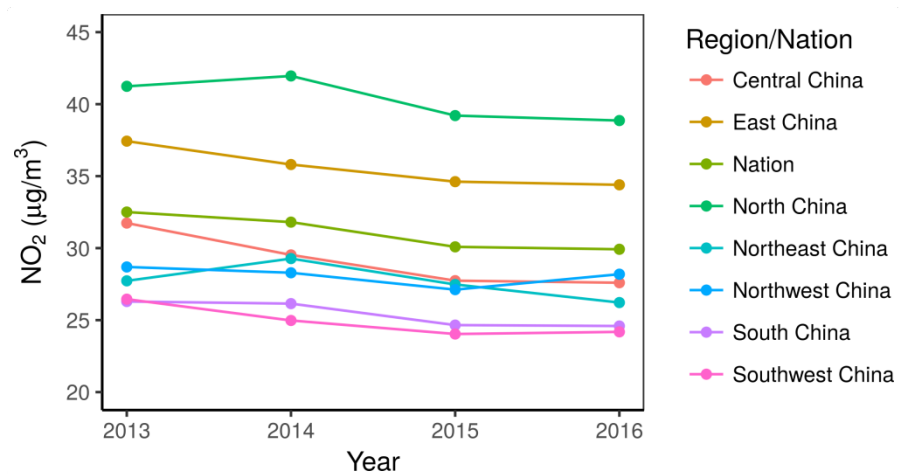

**Figure S17.** Population-weighted annual averages of NO<sub>2</sub> predictions for the major regions and the whole nation of China.

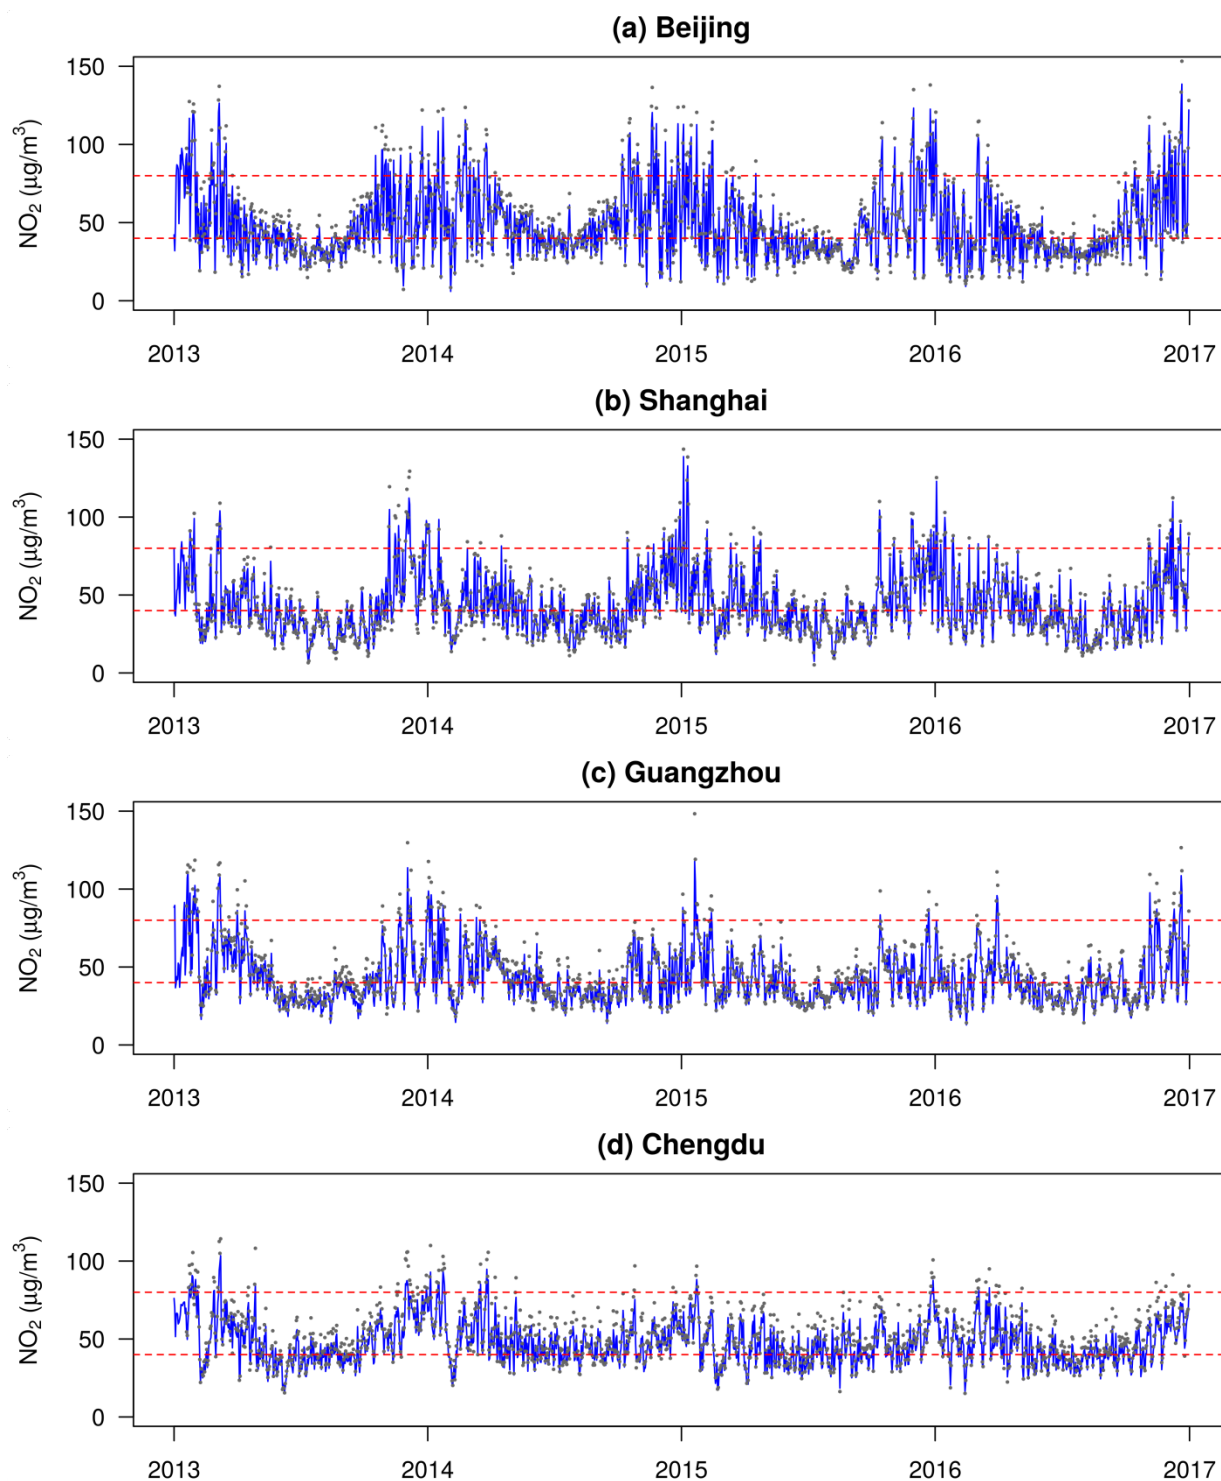

**Figure S18.** Observations (black dots) and predictions (blue lines) of daily  $\text{NO}_2$  during 2013-2016 for (a) Beijing, (b) Shanghai, (c) Guangzhou, and (d) Chengdu, which are the major cities in the Beijing-Tianjin Metro, Yangtze River Delta, Pearl River Delta, the Sichuan Basin regions, respectively.

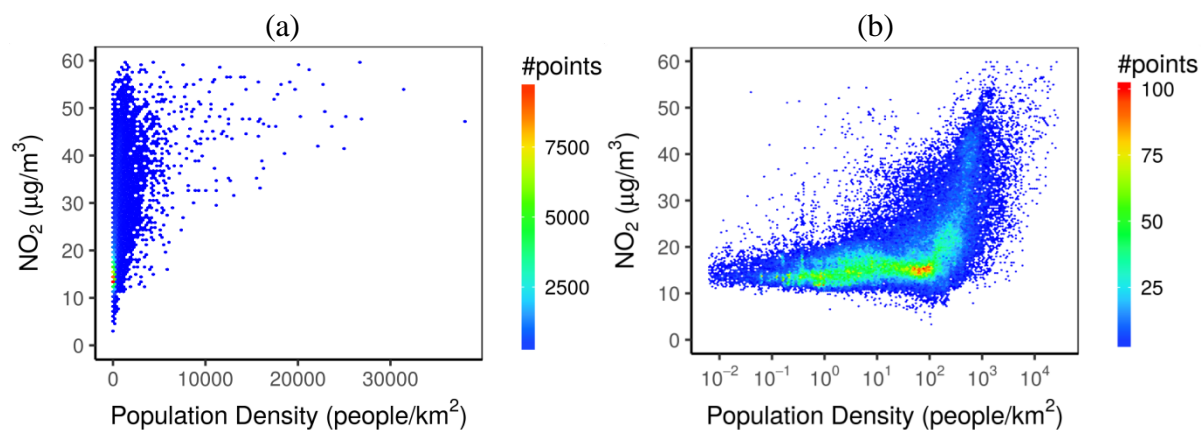

**Figure S19.** Scatterplots showing the relationship between the population density and the estimated average ambient NO<sub>2</sub> concentrations for 2013-2016 in China. The population density is at (a) original and (b) logarithm scales.



## REFERENCES

1. Breiman, L., Random Forests. *Mach. Learn.* **2001**, *45* (1), 5-32.
2. Knibbs, L. D.; Hewson, M. G.; Bechle, M. J.; Marshall, J. D.; Barnett, A. G., A national satellite-based land-use regression model for air pollution exposure assessment in Australia. *Environ. Res.* **2014**, *135*, 204-211.
3. Lee, H. J.; Koutrakis, P., Daily ambient NO<sub>2</sub> concentration predictions using satellite ozone monitoring instrument NO<sub>2</sub> data and land use regression. *Environ. Sci. Technol.* **2014**, *48* (4), 2305-2311.
4. Hystad, P.; Setton, E.; Cervantes, A.; Poplawski, K.; Deschenes, S.; Brauer, M.; van Donkelaar, A.; Lamsal, L.; Martin, R.; Jerrett, M., et al., Creating national air pollution models for population exposure assessment in Canada. *Environ. Health Perspect.* **2011**, *119* (8), 1123-1129.
5. Vienneau, D.; de Hoogh, K.; Bechle, M. J.; Beelen, R.; van Donkelaar, A.; Martin, R. V.; Millet, D. B.; Hoek, G.; Marshall, J. D., Western European land use regression incorporating satellite- and ground-based measurements of NO<sub>2</sub> and PM<sub>10</sub>. *Environ. Sci. Technol.* **2013**, *47* (23), 13555-13564.
6. Hoek, G.; Eeftens, M.; Beelen, R.; Fischer, P.; Brunekreef, B.; Boersma, K. F.; Veeffkind, P., Satellite NO<sub>2</sub> data improve national land use regression models for ambient NO<sub>2</sub> in a small densely populated country. *Atmos. Environ.* **2015**, *105*, 173-180.
7. Liu, W.; Li, X.; Chen, Z.; Zeng, G.; León, T.; Liang, J.; Huang, G.; Gao, Z.; Jiao, S.; He, X., et al., Land use regression models coupled with meteorology to model spatial and temporal variability of NO<sub>2</sub> and PM<sub>10</sub> in Changsha, China. *Atmos. Environ.* **2015**, *116*, 272-280.
8. Meng, X.; Chen, L.; Cai, J.; Zou, B.; Wu, C.-F.; Fu, Q.; Zhang, Y.; Liu, Y.; Kan, H., A land use regression model for estimating the NO<sub>2</sub> concentration in Shanghai, China. *Environ. Res.* **2015**, *137*, 308-315.
9. Yang, X.; Zheng, Y.; Geng, G.; Liu, H.; Man, H.; Lv, Z.; He, K.; de Hoogh, K., Development of PM<sub>2.5</sub> and NO<sub>2</sub> models in a LUR framework incorporating satellite remote sensing and air quality model data in Pearl River Delta region, China. *Environ. Pollut.* **2017**, *226*, 143-153.
10. de Hoogh, K.; Gulliver, J.; Donkelaar, A. v.; Martin, R. V.; Marshall, J. D.; Bechle, M. J.; Cesaroni, G.; Pradas, M. C.; Dedele, A.; Eeftens, M., et al., Development of West-European PM<sub>2.5</sub> and NO<sub>2</sub> land use regression models incorporating satellite-derived and chemical transport modelling data. *Environ. Res.* **2016**, *151*, 1-10.
11. Kim, Y.; Guldmann, J.-M., Land-use regression panel models of NO<sub>2</sub> concentrations in Seoul, Korea. *Atmos. Environ.* **2015**, *107*, 364-373.
12. Larkin, A.; Geddes, J. A.; Martin, R. V.; Xiao, Q.; Liu, Y.; Marshall, J. D.; Brauer, M.; Hystad, P., A global land use regression model for nitrogen dioxide air pollution. *Environ. Sci. Technol.* **2017**, *51* (12), 6957-6964.
13. Bechle, M. J.; Millet, D. B.; Marshall, J. D., National spatiotemporal exposure surface for NO<sub>2</sub>: Monthly scaling of a satellite-derived land-use regression, 2000–2010. *Environ. Sci. Technol.* **2015**, *49* (20), 12297-12305.
14. Young, M. T.; Bechle, M. J.; Sampson, P. D.; Szpiro, A. A.; Marshall, J. D.; Sheppard, L.; Kaufman, J. D., Satellite-based NO<sub>2</sub> and model validation in a national prediction model based on universal kriging and land-use regression. *Environ. Sci. Technol.* **2016**, *50* (7), 3686-3694.
15. Novotny, E. V.; Bechle, M. J.; Millet, D. B.; Marshall, J. D., National satellite-based land-use regression: NO<sub>2</sub> in the United States. *Environ. Sci. Technol.* **2011**, *45* (10), 4407-4414.

16. CIESIN, Gridded Population of the World, Version 4 (GPWv4): Population count. In NASA Socioeconomic Data and Applications Center (SEDAC): Palisades, NY, 2016.
